# Supplementary material
Source: publisher figshare collection journal article supplement (https://karger.figshare.com/ndownloader/files/35082442)
Supplement: Supplementary file 1 [file 35082442]

**Supplementary Data**

**IL-1 Mediates Tissue Specific Inflammation and Severe Respiratory Failure In Covid-19: Clinical And Experimental Evidence**

Running heading: IL-1 bioactivity in COVID-19

Georgios Renieris1, Eleni Karakike1, Theologia Gkavogianni1, Dionysia- Eirini Droggiti1, Dionysios Kafousopoulos1, Mihai G. Netea2,3, Jesper Eugen-Olsen4, John Simard5, Evangelos J. Giamarellos-Bourboulis1

1 4th Department of Internal Medicine, National and Kapodistrian University of Athens, Medical School, 124 62 Athens, Greece

2Immunology and Metabolism, Life & Medical Sciences Institute, University of Bonn, 53115 Bonn, Germany

3Department of Internal Medicine and Center for Infectious Diseases, Radboud University, 6500 Nijmegen, the Netherlands

4Department of Clinical Research, Copenhagen University Hospital Hvidovre, 2650 Hvidovre, Denmark

5XBiotech, 78744 Austin, Texas, USA


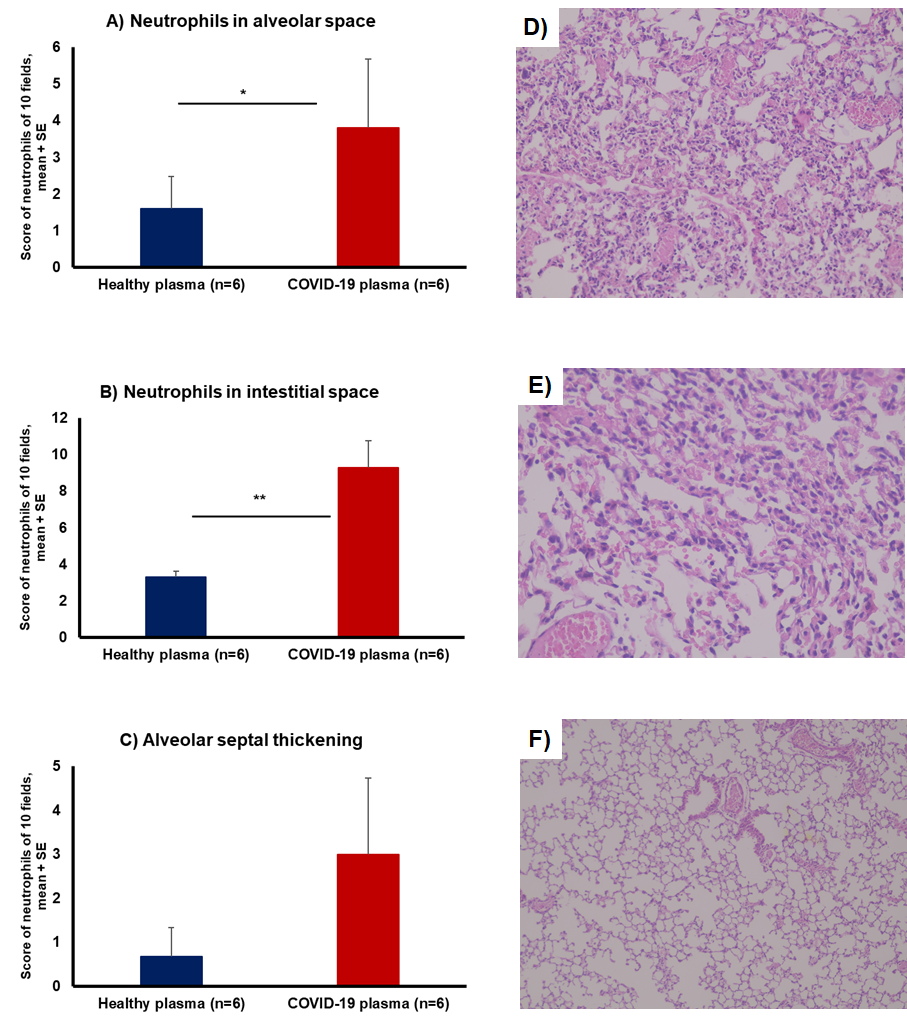


**Figure S1 Lung pathology of the studied experimental COVID-19 pneumonia model**

Mice were sacrificed and lung sections were stained with heamtoxylin-eosin. At least 10 fields were scored from 0 to 2 each field for: A) the degree of presence of neutrophils in the alveoli; B) the degree of the presence of alveoli in the interstitial space; and C) the degree of thickening of the of the alveolar septa. Panels A to C indicate the mean of the total degree of pathology of each animal. Characteristic lung histology sections are shown: D) x10 of one animal challenged with plasma from COVID-19 patient showing diffuse neutrophil and mononuclear infiltration and capillary congestion; E) x25 of one other animal challenged with plasma from another COVID-19 patient showing more dense infiltration and vascular congestion; and F) x10 of one animal challenged with plasma from one healthy individual

Only statistically significant differences by the Mann Whitney U test are shown: *p<0.05; **p<0.01


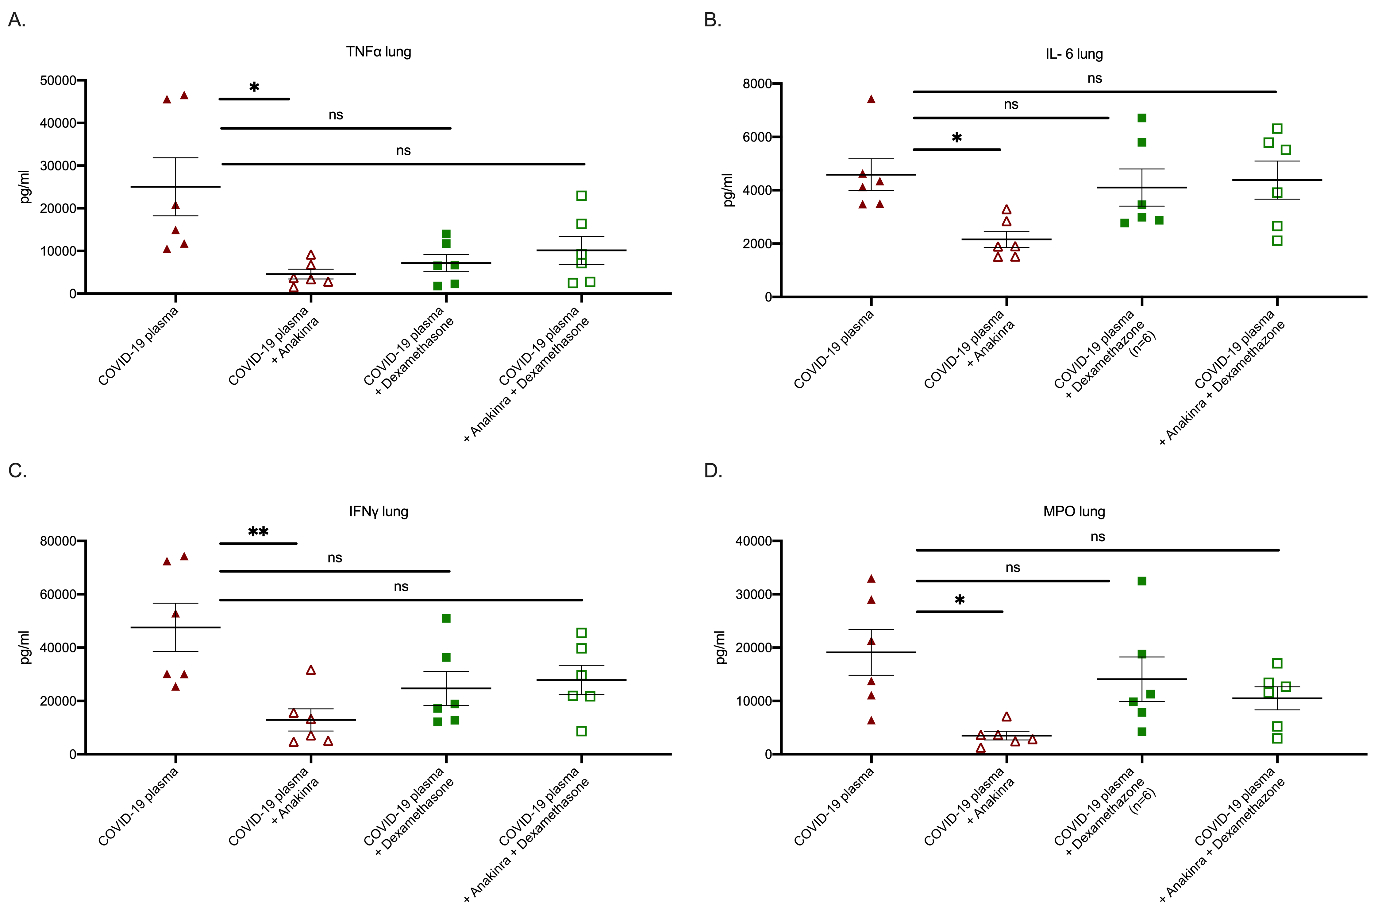
**Figure S2 Dexamethasone attenuates the effect of IL-1a inhibition on the compartmentalized hyperinflammation in a COVID-like murine model**

In a COVID- like infection model, C57Bl6 mice were challenged intravenously (i.v.) with plasma of healthy volunteers (HV) or patients with ARDS due to COVID-19 for three consecutive days. In separate experiments, on each day of plasma challenge, mice were treated with Anakinra; dexamethasone or their combination. Mice were sacrificed on day 4.A-C) Tumor necrosis factor alpha (TNFα); D-E) Interleukin (IL) -6; F) Interferon gamma (IFNγ) and G-I) myeloperoxidase (MPO) activity was determined in tissues. Comparison by the Mann Whitney U test; ns non-significant; ✱ p< 0.05; ✱✱ p< 0.01.


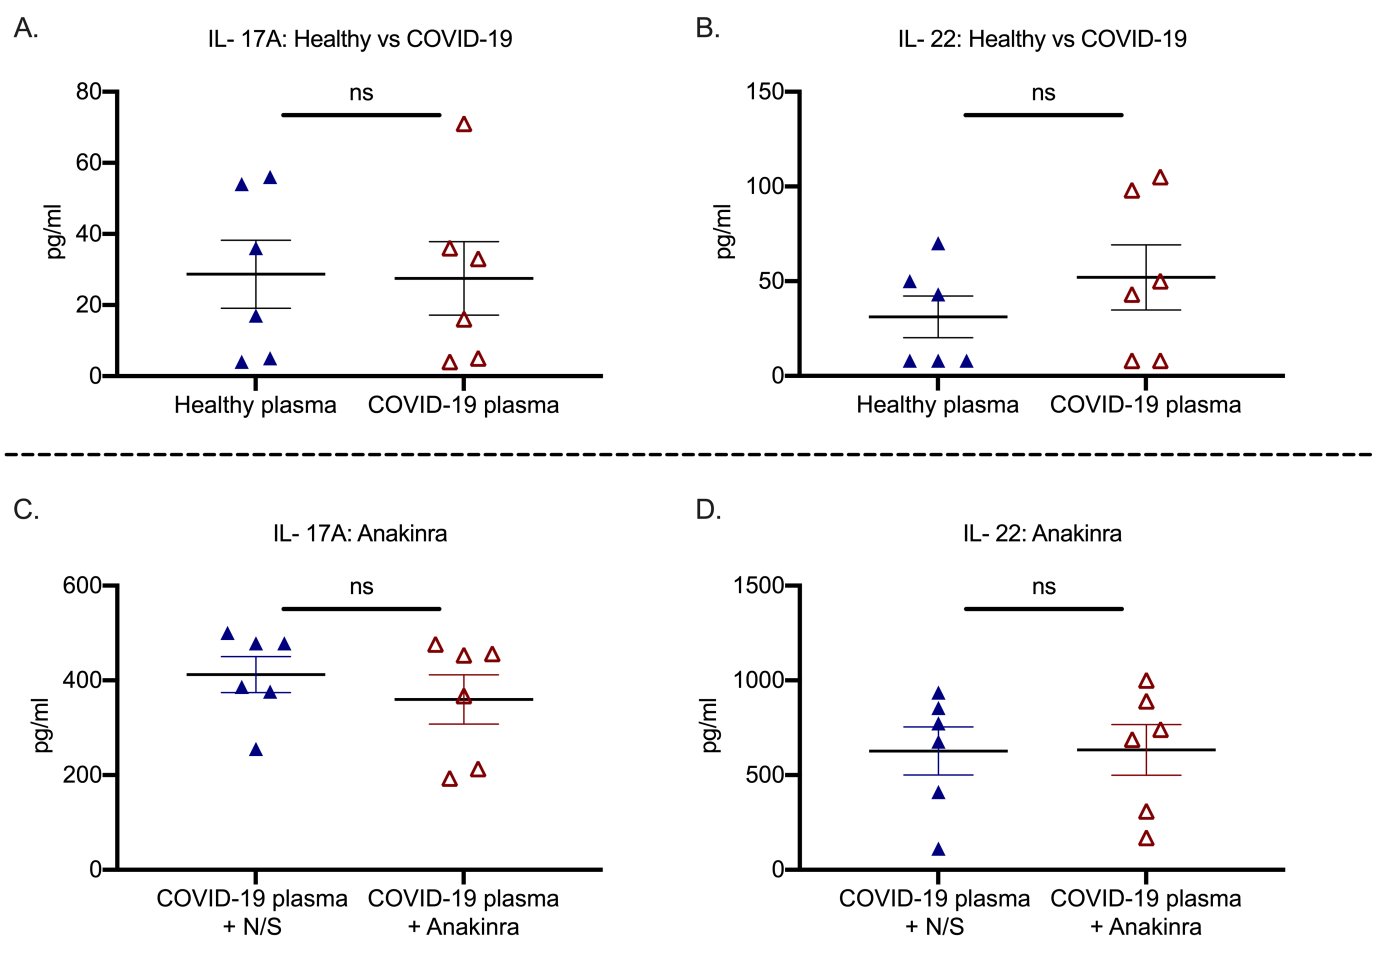


**Figure S3 IL-1 inhibition does not affect Th17 responses in COVID-19**

A-B) In a COVID- like infection model, C57Bl6 mice were treated intravenously (i.v.) with plasma of healthy volunteers or patients with ARDS due to COVID-19 for three consecutive days.

C-D) In a COVID- like infection model, C57Bl6 mice were treated intravenously (i.v.) with plasma of patients with ARDS due to COVID-19 with or without treatment with the IL-1 receptor inhibitor anakinra for three consecutive days.

Mice were sacrificed on day 4.Splenocytes were isolated and incubated with *C. albicans*. Th17 response is shown. Comparison by the Mann Whitney U test; ns non-significant. Treatment of mice with anakinra did not change the ex vivo production capacity of IL- 17A or IL- 22 indicating a lack of correlation with Th17 responses.

**Figure S4 SARS-CoV spike protein is a weak stimulus of cytokine production in a COVID-like murine model**

A-B) In a COVID- like infection model, C57Bl6 mice were treated intravenously (i.v.) with plasma of healthy volunteers or patients with ARDS due to COVID-19 with or without treatment with the IL-1 receptor inhibitor anakinra for three consecutive days.

Mice were sacrificed on day 4.Splenocytes were isolated and incubated with SARS-CoV-2 spike protein for the production of interferon-gamma (IFNγ), tumour necrosis factor-alpha (TNFα) and interleukin (IL)-6. Comparison by the Mann Whitney U test; ns non-significant.


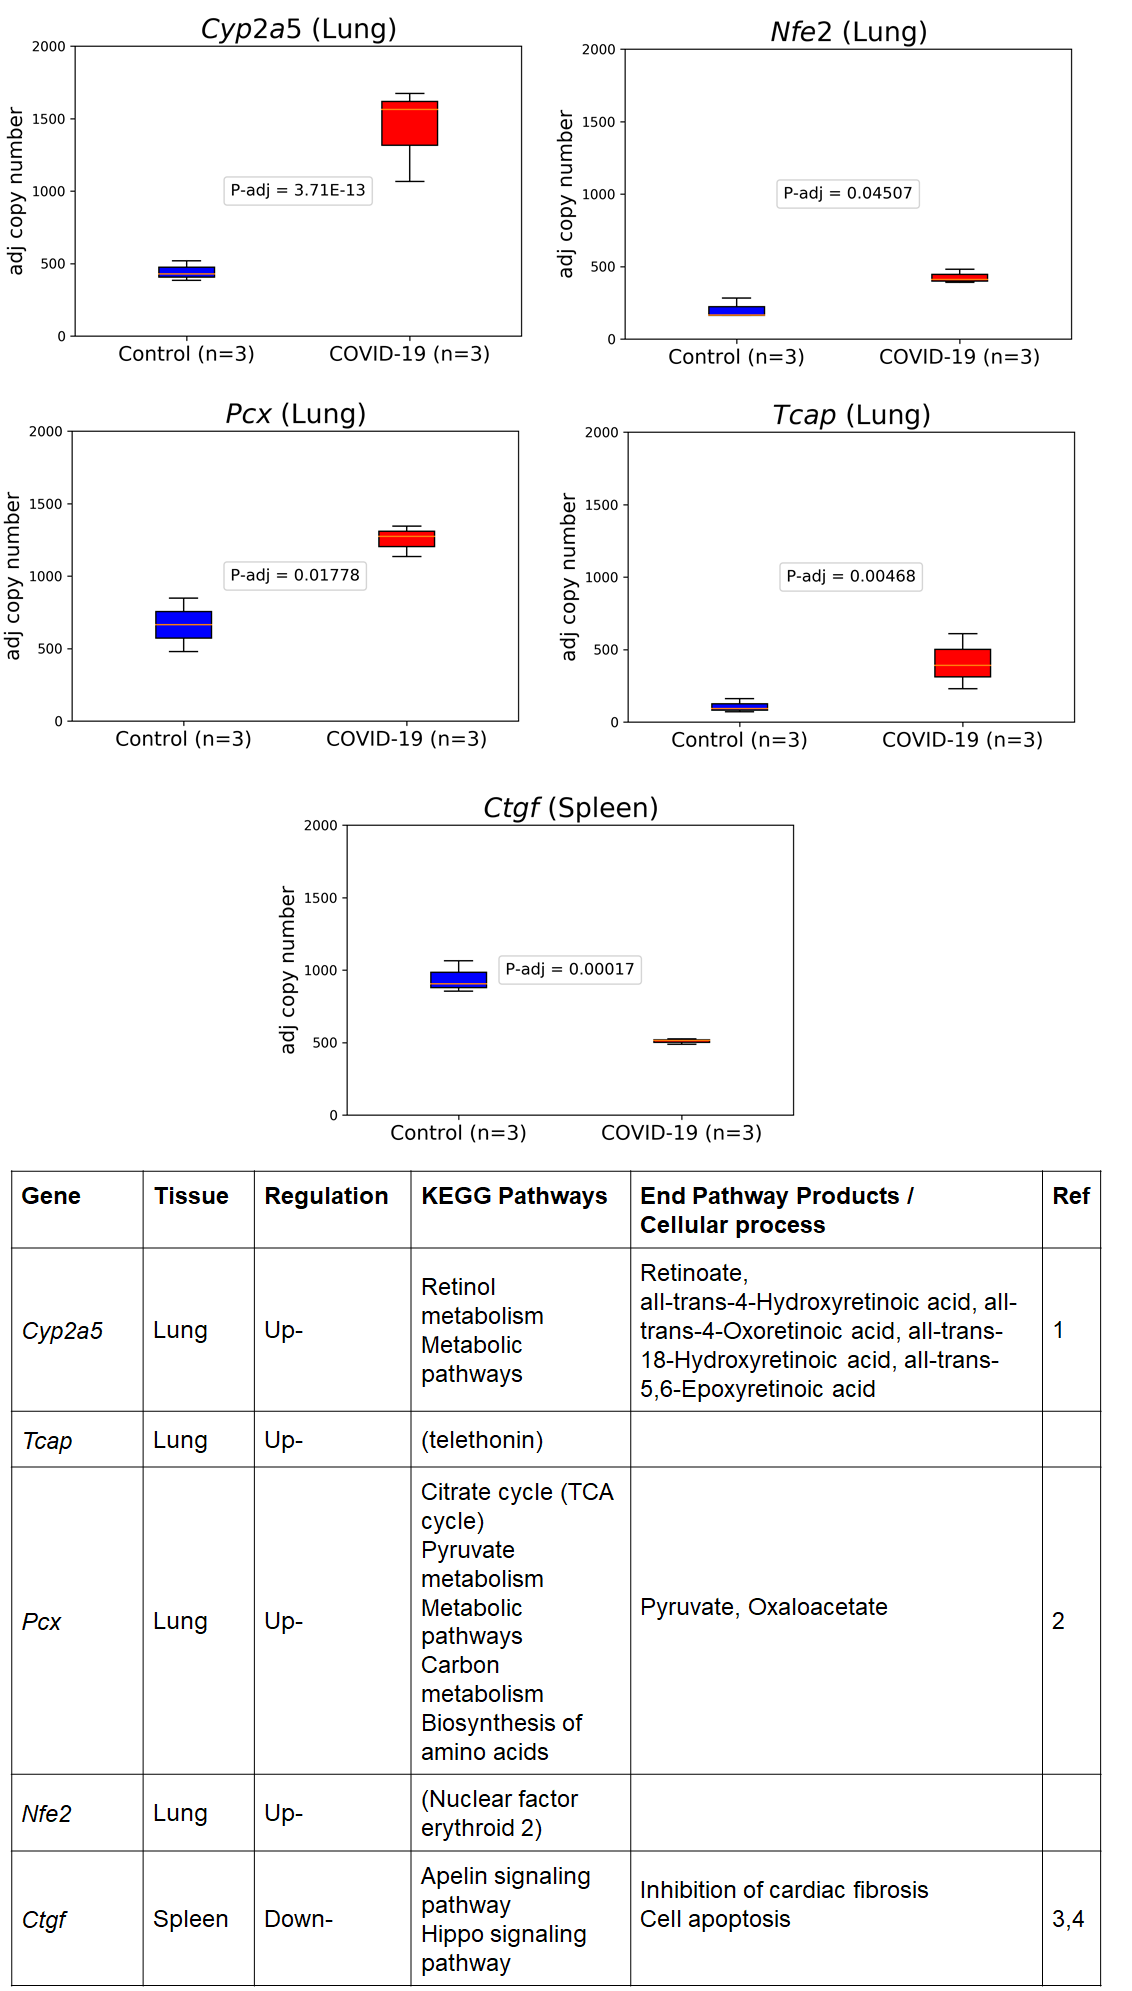


**Figure S5 Pathways associated with the studied animal model of COVID-19**

In a COVID- like infection model, C57Bl6 mice were treated intravenously (i.v.) with plasma of healthy volunteers or patients with ARDS due to COVID-19. After three days of treatment, mice were sacrificed and transcriptomic analysis was done in sections of the lung and spleen. Bioanalysis denoted four up-regulated genes in the lung and one down-regulated gene in the spleen after injection with plasma of COVID patients. A Table with the implicated pathways is also provided.

**Figure S6 Lack of correlation between cytokine production in tissues and number of viral transcripts**

The number of transcripts of the *ORF1 ab* gene and *N* gene of SARS-COV-2 was determined in plasma of patients with ARDS due to COVID-19. In a COVID- like infection model, C57Bl6 mice were treated intravenously (i.v.) with the same plasma from patients with ARDS due to COVID-19 for three consecutive days. Correlation of number of transcripts of the ORF1 ab gene (Α – D) and n gene (E – H) with TNFα, IL- 6, IFNγ and MPO in the lung. Spearman rank correlation coefficients (rs), interpolation lines and p- values are given.


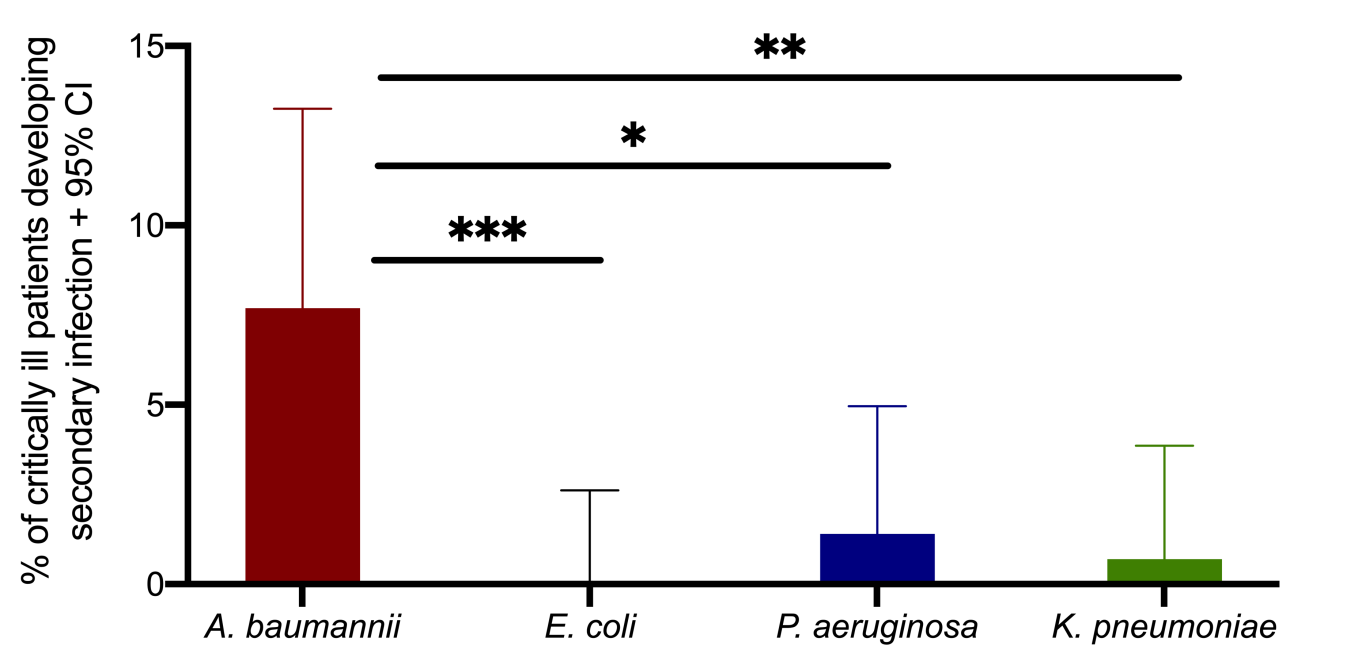


**Figure S7 COVID- 19 is associated with increased susceptibility to secondary infection due to *A. baumannii***

Percentage of critically ill COVID- 19 patients who developed secondary bacteremia by Gram- negative bacteria within 28 days after admission, sorted by type of bacteria. Comparisons by the Fisher exact test. ✱ p< 0.05; ✱✱ p< 0.01; ✱✱✱✱ p< 0.0001.

| **Table S1. Baseline clinical and laboratory characteristics of critically ill patients with pneumonia by SARS-CoV-2 coronavirus according to development of secondary bacteremia or not** | | | | |
| --- | --- | --- | --- | --- |
|  | *A. baumannii* bacteremia  (n=11) | Other gram-negative  bacteriemia  (n=3) | No secondary bacteremia  (n=120) | p-value |
| Age (years, mean ± SD) # | 66.11 ± 9.75 | 63.00 ± 1.73 | 63.92 ± 13.57 | 0.884 |
| CCI (mean ± SD) # | 3.00 ± 1.80 | 2.33 ± 0.58 | 2.79 ± 1.81 | 0.854 |
| APACHE II score (mean ± SD) # | 11.89 ± 5.01 | 9.33 ± 5.25 | 10.26 ± 5.18 | 0.663 |
| SOFA (mean ± SD) # | 5.67 ± 1.87 | 6.00 ± 2.65 | 6.10 ± 2.88 | 0.907 |
| Laboratory values (mean ± SD) | | | | |
| White blood cells (mm3) | 13620 ± 5085 | 11777 ± 3487 | 10095 ± 5252 | 0.206# |
| Absolute neutrophil counts (mm3) | 11950 ± 4794 | 10695 ± 3678 | 8522 ± 4956 | 0.167# |
| Absolute lymphocyte counts (mm3) | 951 ± 739 | 689 ± 219 | 913 ± 629 | 0.819# |
| Platelets (x 103, mm3) | 289428 ± 65739 | 263000 ± 32741 | 253731 ± 108144 | 0.683# |
| C-reactive protein (mg/l) | 154.72 ± 123.90 | 142.77 ± 105.96 | 137.54 ± 215.62 | 0.984# |
| Ferritin (ng/ml) | 1502 ± 1844 | 815 ± 566 | 1439 ± 1786 | 0.829# |
| Procalcitonin (ng/ml) | 042 ± 0.65 | 0.13 ± 0.05 | 0.98 ± 1.96 | 0.694# |
| D-dimers (ng/ml) | 18571 ± 38008 | 1046 ± 631 | 3715 ± 16917 | 0.222# |
| AST (U/l) | 49.21 ± 63.40 | 48.00 ± 34.66 | 51.51 ± 41.31 | 0.982# |
| ALT (U/l) | 35.80 ± 23.75 | 44.33 ± 24.38 | 52.68 ± 57.96 | 0.727# |
| Creatinine (mg/dl) | 0.81 ± 0.33 | 0.77 ± 0.06 | 1.26 ± 1.60 | 0.667# |
| Abbreviations: SD: standard deviation; APACHE: acute physiology and chronic health evaluation; CCI: Charlson’s comorbidity index; SOFA: sequential organ failure; AST: aspartate aminotransferase; ALT: alanine aminotransferase.  Comparisons by one-way ANOVA with the Bonferroni correction. | | | | |

**REFERENCES**

1. Marill J, Cresteil T, Lanotte M, Chabot GG. Identification of human cytochrome P450s involved in the formation of all-trans-retinoic acid principal metabolites. *Mol Pharmacol.* 2000;58:1341-8.
2. Lao-On U, Attwood PV, Jitrapakdee S. Roles of pyruvate carboxylase in human diseases: from diabetes to cancers and infection. *J Mol Med.* 2018;96:237-47.
3. Mashimo K, Ohno Y. Cultured neonatal rat cardiomyocytes continue beating through upregulation of CTGF gene expression. *J Nippon Med Sch.* 2020;87:268-76.
4. Tamura T, Kodama T, Sato K, Murai K, Yoshiaka T, Shigekawa M, Yamada R, Hikita H, Sakamori R, Akita H, Eguchi H, Johnson RL, Yokoi H, Mukoyama M, Tatsumi T, Takehara T. Dysregulation of PI3K and hippo signaling pathways synergistically induces chronic pancreatitis via CTGF upregulation.” J Clin Invest. 2021;131:e143414.
